# Supplementary material for: Copolymer-templated nitrogen-enriched nanocarbons as a low charge-transfer resistance and highly stable alternative to platinum cathodes in dye-sensitized solar cells
Source: Royal Society of Chemistry journal article supplement (doi:10.1039/c4ta07012g), 2015-01-01
Supplement: c4ta07012g1.pdf [file c4ta07012g1.pdf]

## Supporting Information

# Copolymer-Templated Nitrogen-Enriched Nanocarbons as Low Charge-Transfer Resistance and Highly Stable Alternative to Platinum Cathodes in Dye-Sensitized Solar Cells

Myung Jong Ju,<sup>a,§</sup> In Taek Choi,<sup>a,§</sup> Mingjiang Zhong,<sup>b,§,†</sup> Kimin Lim,<sup>c</sup>  
Jaejung Ko,<sup>c</sup> Jacob Mohin,<sup>b</sup> Melissa Lamson,<sup>b</sup> Tomasz Kowalewski,<sup>b,\*</sup>  
Krzysztof Matyjaszewski,<sup>b,\*</sup> Hwan Kyu Kim,<sup>a,\*</sup>

<sup>a</sup>Global GET-Future Lab. and Department of Advanced Materials Chemistry, Korea University, 2511 Sejong-ro, Sejong 339-700, Korea. E-mail: hkk777@korea.ac.kr.

<sup>b</sup>Department of Chemistry, Carnegie Mellon University, 4400 Fith Avenue, Pittsburgh, Pennsylvania 15213, United States. E-mail:  
km3b@andrew.cmu.edu.tomek@andrew.cmu.edu

<sup>c</sup>Photovoltaic Materials & Department of Advanced Materials Chemistry, Korea University, 2511 Sejong-ro, Sejong 339-700, Korea.

<sup>†</sup> Present Addresses: Department of Chemistry and Department of Chemical Engineering, Massachusetts Institute of Technology, 77 Massachusetts Avenue, Cambridge MA 02215.

<sup>§</sup>These authors contributed equally to this work.

### **Fabrication of the counter electrode on FTO**

0.1 wt% CTNC-series materials was dispersed in 2-propanol solution by ultrasonication for 30 min and the solution was left for 2 h to separate larger particles by sedimentation. The resulting solution was deposited directly on FTO (TEC-8, Pilkington) using an e-spray technique. First, the CTNC solution was loaded into a plastic syringe equipped with a 30-gauge stainless steel hypodermic needle. The needle was connected to a high voltage power supply (ESN-HV30). A voltage of  $\sim 4.6$  kV was applied between a metal orifice and the conducting substrate at a distance of 5 cm, and substrate temperature of 60 °C. The feed rate was controlled by the syringe pump at a constant flow rate of 70  $\mu\text{L min}^{-1}$ . For effective comparison, a conventional Pt CE was also prepared by deposition of *ca.* 20  $\mu\text{L/cm}^2$  of  $\text{H}_2\text{PtCl}_6$  solution (2 mg of  $\text{H}_2\text{PtCl}_6$  in 1 mL of ethanol), and then it was sintered at 400 °C for 15 min. To evaluate the electrocatalytic activity of sample materials, a symmetrical sandwich dummy cell was fabricated from two identical CTNC-FTO or Pt-FTO sheets, which were separated by 60  $\mu\text{m}$  thick Surllyn (Solaronix, Switzerland) tape as a seal and spacer leaving  $0.6 \times 0.6$   $\text{cm}^2$  active area. The cell was filled with an electrolyte solution through a hole in one FTO support which was finally closed by a Surllyn seal. The FTO sheet edges were coated by ultrasonic soldering (USS-9200, MBR Electronics) to improve electrical contacts.

### **Assembly of dye-sensitized solar cells**

FTO plates were cleaned in detergent solution, water, and ethanol using an ultrasonic bath. The FTO substrates were immersed in 40 mM aqueous  $\text{TiCl}_4$  solution at 70 °C for 30 min and washed with water and ethanol. A  $\text{TiO}_2$  colloidal paste (Dyesol, 18NR-T) was screen-printed onto FTO/glass and sintered at 500 °C for 30 min in air. The thickness of the transparent layer was measured by using an Alpha-step 250 surface stylus-type profilometer (Tencor Instruments, San Jose, CA), and a paste for the scattering layer containing 400 nm sized

anatase particles (CCIC, PST-400C) was deposited by screen-printing and then dried for 1 h at 120 °C. The TiO<sub>2</sub> electrodes were sintered at 500 °C for 30 min. The resulting TiO<sub>2</sub> electrodes were immersed in a THF/ethanol (v/v, 1/2) solution containing 0.3 mM of **JK-306** sensitizer<sup>S1</sup> and 0.3 mM of a multi-functional coadsorbent HC-A (**SGT-301**)<sup>S2-S5</sup> (or 0.3 mM of N719 sensitizer only) and kept at room temperature for 12 h. The dye adsorbed TiO<sub>2</sub> photoanodes were assembled with **CTNCs**-FTO or Pt CEs using a thermal adhesive film (25 μm thick Surlyn, Du-Pont) as a spacer to produce a sandwich-type cell. The electrolyte solution was 0.22 M Co(bpy)<sub>3</sub>(BCN<sub>4</sub>)<sub>2</sub>, 0.05 M Co(bpy)<sub>3</sub>(BCN<sub>4</sub>)<sub>3</sub>, 0.1 M LiClO<sub>4</sub>, and 0.8 M 4-*tert*-butylpyridine in acetonitrile. Another iodine electrolyte solution composed of 0.6 M DMPII, 0.1 M LiI, 0.05 M I<sub>2</sub>, and 0.5 M TBP in acetonitrile was also used for the performance test of N719-based DSSCs. Electrolyte solution was introduced through a drilled hole on the CE *via* vacuum backfilling. The hole was sealed with cover glass using a Surlyn seal.

Photoelectrochemical data were measured using a 1000 W xenon light source (Oriel, 91193) that was focused to give 100 mW cm<sup>-2</sup>, which is the equivalent of one sun at Air Mass (AM) 1.5G at the surface of the test cell. The light intensity was adjusted with a Si solar cell that was doubled-checked with an NREL calibrated Si solar cell (PV Measurement Inc.). The applied potential and measured cell current were measured using a Keithley model 2400 digital source meter. The current-voltage characteristics of the cell under these conditions were determined by biasing the cell externally and measuring the generated photocurrent. This process was fully automated using Wavemetrics software. The measurement-settling time between applying a voltage and measuring a current for the current-voltage characterization of DSSCs was fixed to 80 ms.

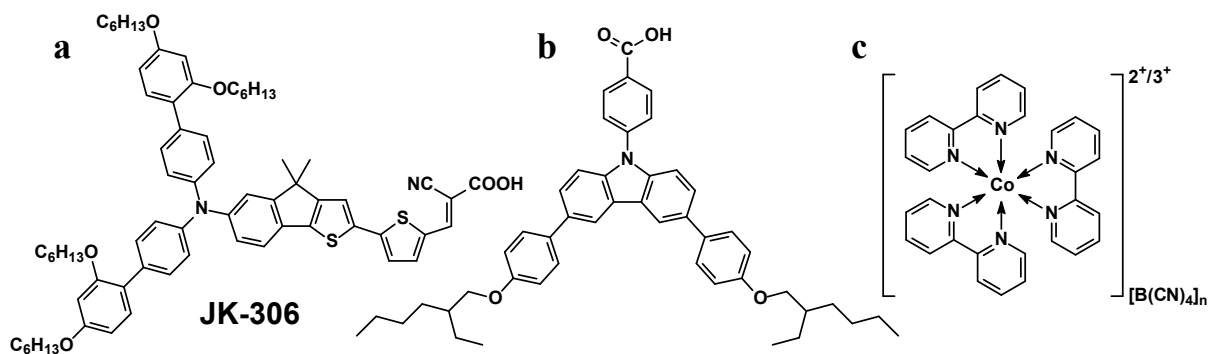

Chemical formulas: (a) **JK-306** sensitizer; (b) **HC-A** coadsorbent (**SGT-301**); (c)  $\text{Co}(\text{bpy})_3^{2+/3+}$  redox couple.

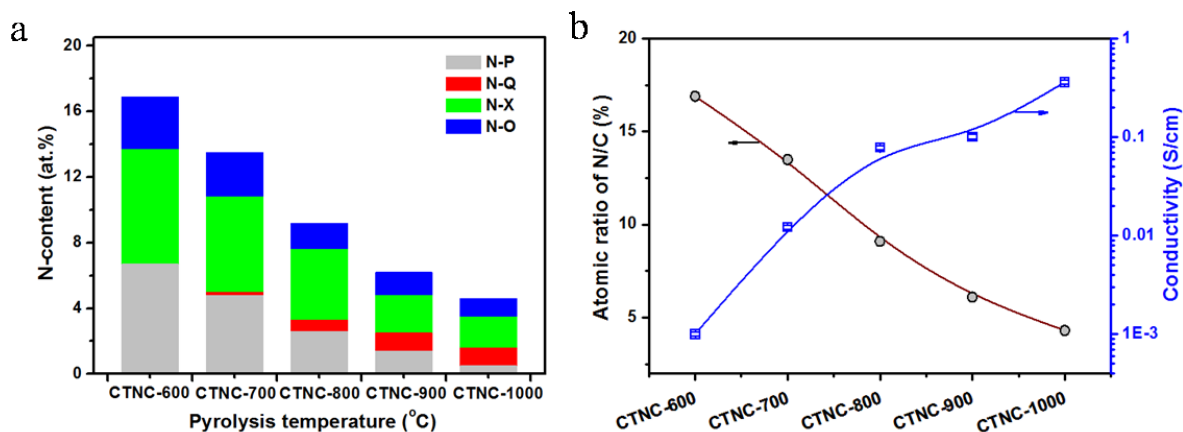

**Fig. S1** (a) Nitrogen-bonding distributions in carbon framework. N-P; pyridinic N, N-Q; quaternary N, N-X; pyrrolic N (or pyridonic N); N-O; pyridinic N-oxide. (b) Atomic ratio of N/C in carbon framework and their conductivity as a function of pyrolysis temperature.

In previous work,<sup>S6</sup> high-resolution N1s XPS spectra were used to determine the nitrogen states in the **CTNC** samples. By deconvoluting N1s spectra, four kinds of N species can be identified by the bonding states of the N atom, including pyridinic N (398.5 eV), pyrrolic or pyridonic N (indistinguishable) (400.5 eV), quaternary N (401.3 eV), and pyridinic N-oxide (403.2 eV). The composition atomic ratios of four types of N species in the five CTNC

samples are summarized in **Table S2** and **Fig. S1a**. This data shows an obvious difference in the content of N species between the samples. For **CTNC-600**, the pyridinic and pyrrolic/pyridonic configurations are dominant, and quaternary N sites are almost not present. Upon increasing the pyrolysis temperature to 1000 °C, the content of pyridinic and pyrrolic/pyridonic N sharply decreases to 0.5 wt% or 1.9 wt%, respectively, accompanied by the increase of quaternary N. An according drop in sheet resistance (**Fig. S1b**) with pyrolysis temperature suggests the formation of larger graphitic domains through fusion of smaller ones with a concurrent denitrogenation processes.

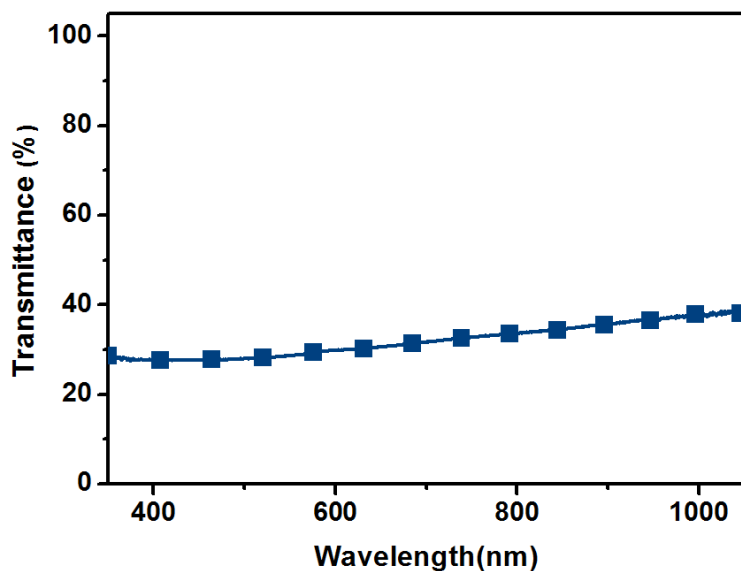

**Fig. S2** Optical transmittance of CTNC film on FTO.

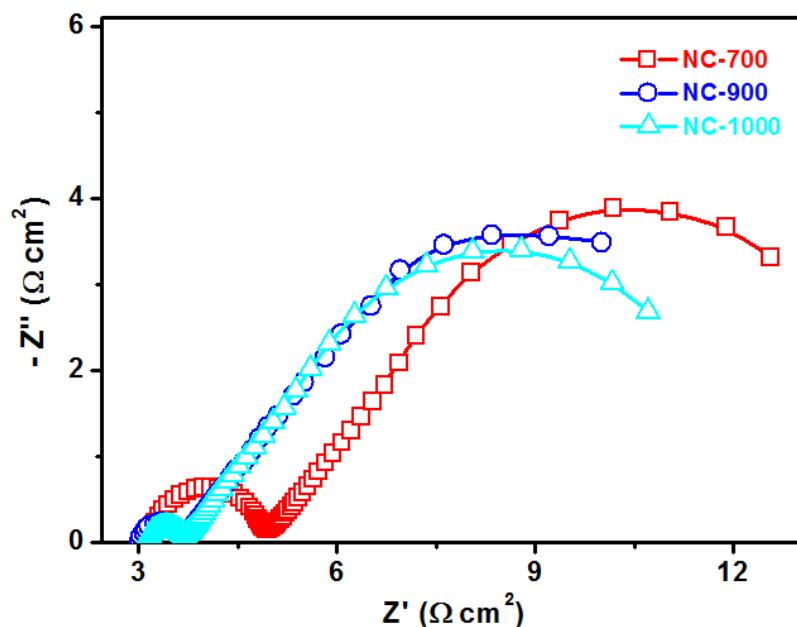

**Fig. S3** (a) Nyquist plots of symmetrical dummy cells consisting of different electrodes with frequency ranging from  $10^6$  to 0.1 Hz, and amplitude of the alternating current set to 10 mV using a  $\text{Co}(\text{bpy})_3^{2+/3+}$  based electrolyte.

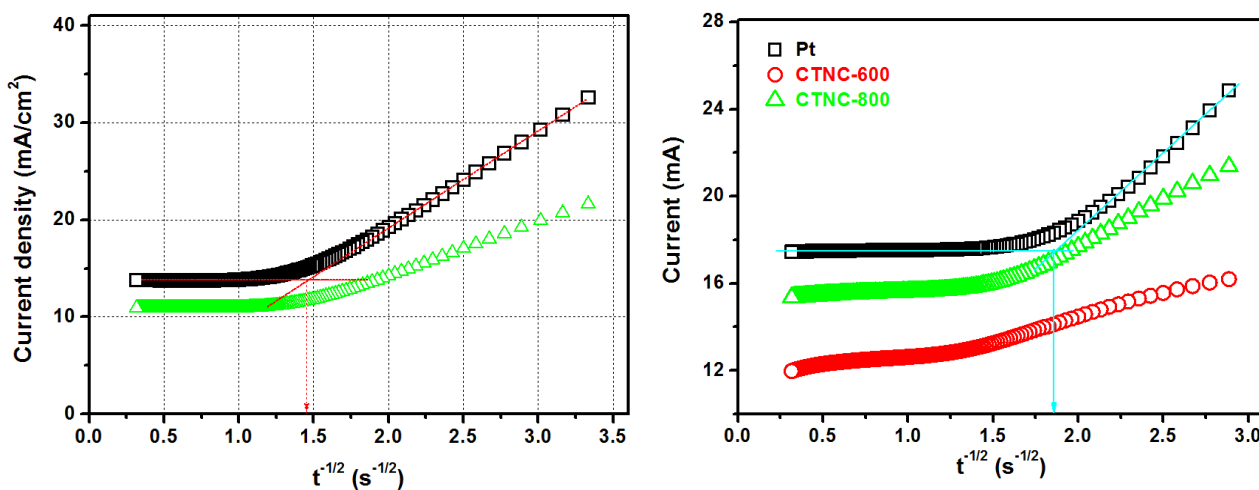

**Fig. S4** Potential-step chronoamperometry (CA) plots on symmetrical dummy with the CTNC-800 (black) and Pt (green) electrodes in  $\text{Co}(\text{bpy})_3^{2+/3+}$  electrolyte (left) and for CTNC-600, CTNC-800, and Pt electrodes in the  $\text{I}^-/\text{I}_3^-$  redox couple system (right). Potential was stepped from 0 to 0.8 V and held for 10 s. To examine the mass transport properties of  $\text{Co}(\text{bpy})_3^{3+}$ , CA measurements were carried out at room temperature. Shortly after the

potential step, the current follows the semi-infinite Cottrell-like decay. The current drops linearly with  $t^{-1/2}$  ( $t$  is time) as long as the concentration profiles in front of each electrode merge to form a single linear profile. At this stage, the current attains a steady state value, which is equal to the limiting current. Extrapolation of both linear components of the CA plots provides intersection at the so-called transition time ( $t$ ), which provides the diffusion coefficient  $D$  according to the eq. (S2).<sup>S7</sup>

$$\frac{nFAC \cdot \sqrt{D}}{\sqrt{\pi t}} = \frac{2nFAC \cdot D}{\delta} \quad (\text{S1})$$

$$D = t^{-1} \left( \frac{\delta^2}{4\pi} \right) \quad (\text{S2})$$

From the data in **Fig. S4** and eq. (S2), we can calculate the values of  $D = 6.94 \times 10^{-6}$  and  $6.83 \times 10^{-6} \text{ cm}^2/\text{s}$  for CTNC-800 and Pt dummy cells, respectively.

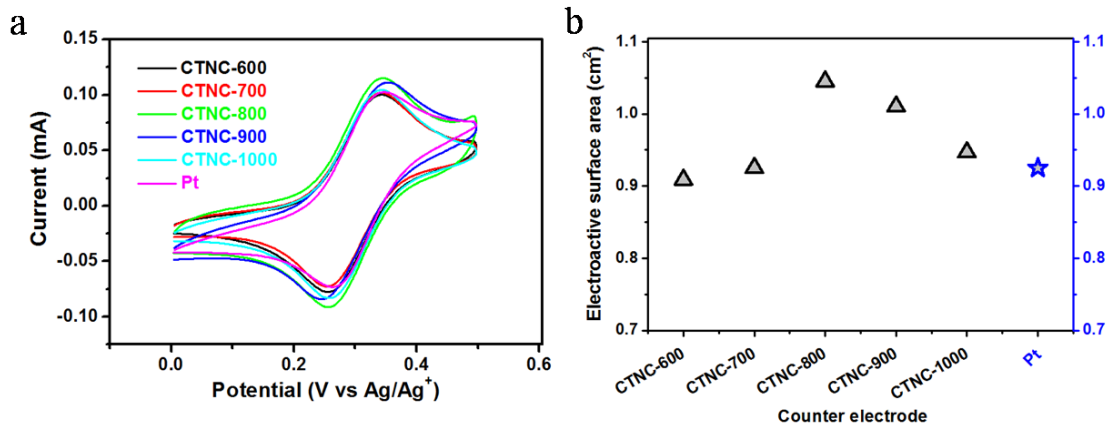

**Fig. S5** (a) CV curves of Pt and CTNC electrodes in  $\text{Co}(\text{bpy})_3^{2+/3+}$  solution. The electrolyte concentration was 100 times lower than that used in a typical DSSC performance test along with 0.1 M  $\text{LiClO}_4$  as supporting electrolyte. (b) The calculated electroactive surface area of different counter electrodes. The test area is  $0.43 \text{ cm}^2$  ( $\pi r^2$ ).

The electro-active surface area was calculated according to the Randles-Sevcik equation,

$$A = \frac{I_{pc}}{2.69 \times 10^5 \times n^{3/2} \times D^{1/2} \times V^{1/2} \times C} \quad (\text{S3})$$

where,  $A$  is the electro-active surface area ( $\text{cm}^2$ ),  $I_{pc}$  is the peak current (A), and  $n = 1$ ,  $D = 6.94 \times 10^{-6}$  (CTNC-electrodes) and  $6.83 \times 10^{-6}$   $\text{cm}^2/\text{s}$  (Pt-electrode) obtained from chronoamperometry (Fig. S4),  $V$  is the scan rate (10 mV/s),  $C$  is the concentration (mol/ml).

| CE                                            | CTNC-600 | CTNC-700 | CTNC-800 | CTNC-900 | CTNC-1000 | Pt    |
|-----------------------------------------------|----------|----------|----------|----------|-----------|-------|
| Electro-active surface area ( $\text{cm}^2$ ) | 0.909    | 0.925    | 1.045    | 1.011    | 0.947     | 0.925 |

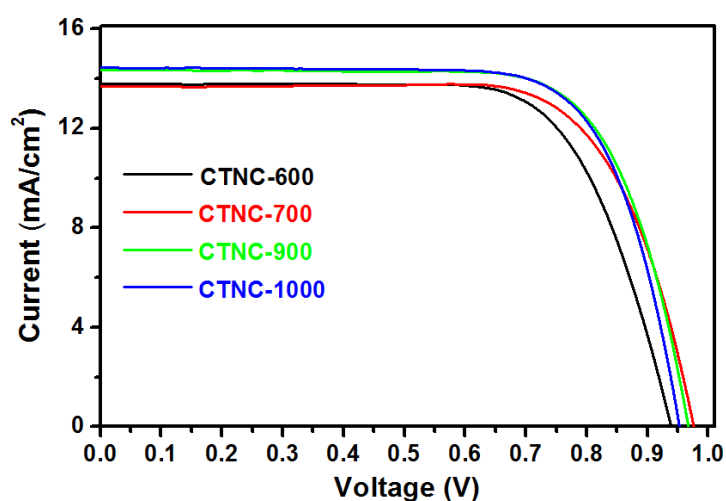

**Fig. S6** Current-voltage curves of the  $\text{Co}(\text{bpy})_3^{2+/3+}$ -based DSSCs with CTNC-600, CTNC-700, CTNC-900, and CTNC-1000 CEs under one sun illumination (AM 1.5 G). The  $\text{TiO}_2$  film thickness is  $8.5 (5.5 + 3) \mu\text{m}$ . All cells were tested with a metal shadow mask having an aperture area of  $0.16 \text{ cm}^2$ , but without consideration of masking the sides of the DSSCs.



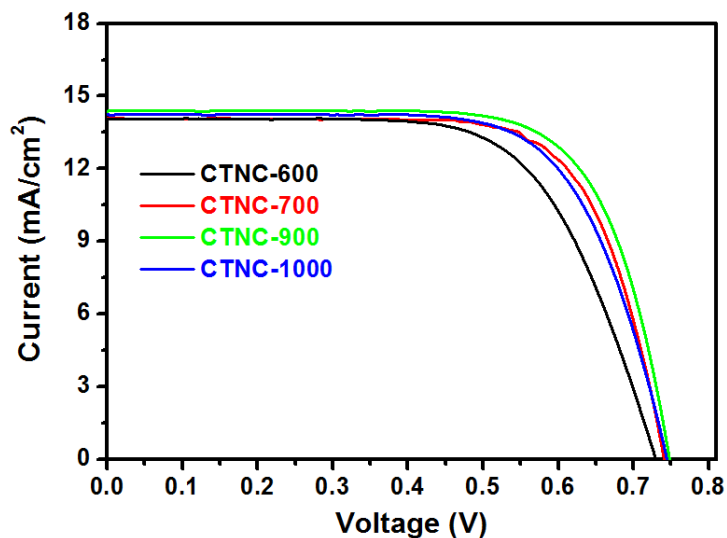

**Fig. S7** Current-voltage curves of the I<sup>-</sup>/I<sub>3</sub><sup>-</sup>-based DSSCs with CTNC-600, CTNC-700, CTNC-900, and CTNC-1000 CEs under one sun illumination (AM 1.5 G). The TiO<sub>2</sub> film thickness is 8.5 (5.5 + 3) μm. All cells were tested with a metal shadow mask having an aperture area of 0.16 cm<sup>2</sup>, but without consideration of masking the sides of the DSSCs.

**Table S1.** Surface area and pore size analysis by N<sub>2</sub> isotherm

| CTNC<br>Sample | Surface area (m <sup>2</sup> /g) |           |           | $S_{mes}/S_{BET}$ | Pore volume<br>(cm <sup>3</sup> /g) |
|----------------|----------------------------------|-----------|-----------|-------------------|-------------------------------------|
|                | $S_{BET}$                        | $S_{mic}$ | $S_{mes}$ |                   |                                     |
| CTNC-600       | 461                              | 264       | 210       | 0.46              | 0.65                                |
| CTNC-700       | 498                              | 277       | 223       | 0.45              | 0.67                                |
| CTNC-800       | 485                              | 278       | 220       | 0.45              | 0.65                                |
| CTNC-900       | 509                              | 256       | 254       | 0.50              | 0.71                                |
| CTNC-1000      | 564                              | 227       | 328       | 0.58              | 0.76                                |

**Table S2.** The composition atomic ratios of each type of N species in five CTNC samples

| CTNC samples | O/C<br>(±0.5)<br>(at.%) | N/C<br>(±0.8)<br>(at.%) | Pyridinic N/C<br>(at.%) | Quaternary<br>N/C (at.%) | Pyrrolic N(or<br>pyridonic<br>N)/C (at.%) | Pyridinic N-<br>oxide/C<br>(at.%) |
|--------------|-------------------------|-------------------------|-------------------------|--------------------------|-------------------------------------------|-----------------------------------|
| CTNC-600     | 7.1                     | 16.9                    | 6.7                     | -                        | 7.0                                       | 3.2                               |
| CTNC-700     | 7.3                     | 13.5                    | 4.8                     | 0.2                      | 5.8                                       | 2.7                               |
| CTNC-800     | 7.3                     | 9.1                     | 2.6                     | 0.7                      | 4.3                                       | 1.6                               |
| CTNC-900     | 7.2                     | 6.1                     | 1.4                     | 1.1                      | 2.3                                       | 1.4                               |
| CTNC-1000    | 5.9                     | 4.3                     | 0.5                     | 1.1                      | 1.9                                       | 1.1                               |

**Table S3.** EIS parameters for the studied N-enriched carbon cathodes (mean value of five dummy cells), with  $\text{Co}(\text{bpy})_3^{3+/2+}$  redox shuttle

| CE        | $R_s$<br>( $\Omega \text{ cm}^2$ ) | $R_{CT}$<br>( $\Omega \text{ cm}^2$ ) | $C_{dl}$<br>( $\mu\text{F cm}^2$ ) | $J_0$<br>( $\text{mA cm}^{-2}$ ) |
|-----------|------------------------------------|---------------------------------------|------------------------------------|----------------------------------|
| CTNC-600  | 1.81±0.24                          | 5.01±0.57                             | 8.76±0.20                          | 5.06±0.70                        |
| CTNC-700  | 1.56±0.04                          | 0.71±0.17                             | 7.42±0.54                          | 37.80±9.20                       |
| CTNC-800  | 1.55±0.04                          | 0.31±0.04                             | 4.87±0.30                          | 84.31±12.91                      |
| CTNC-900  | 1.52±0.08                          | 0.38±0.03                             | 11.32±0.77                         | 68.50±6.10                       |
| CTNC-1000 | 1.53±0.03                          | 0.34±0.03                             | 17.51±0.55                         | 76.09±6.59                       |
| Pt        | 1.62±0.27                          | 1.35±0.36                             | 20.94±2.90                         | 19.98±5.20                       |

Table S4. Photovoltaic performance of the DSSCs with different counter electrodes

| Counter electrode | $V_{OC}$<br>(mV) | $FF$<br>(%) | $J_{SC}$<br>(mA/cm <sup>2</sup> ) | PCE<br>(%)   |
|-------------------|------------------|-------------|-----------------------------------|--------------|
| CTNC-600          | 945 (729)        | 67.4 (65.8) | 14.16 (14.06)                     | 9.02 (6.75)  |
| CTNC-700          | 976 (740)        | 72.1 (71.9) | 13.68 (14.07)                     | 9.63 (7.50)  |
| CTNC-900          | 967 (748)        | 73.0 (72.1) | 14.35 (14.38)                     | 10.13 (7.75) |
| CTNC-1000         | 953 (744)        | 73.4 (69.4) | 14.44 (14.22)                     | 10.09 (7.36) |

(<sup>o</sup>) Photovoltaic performance of the N719-based DSSCs with different CEs in I<sup>-</sup>/I<sub>3</sub><sup>-</sup> redox electrolyte.

## References

- S1. Lim, K.; Ju, M. J.; Song, J.; Choi, I. T.; Do, K.; Choi, H.; Song, K.; Kim, H. H.; Ko, J. Organic Sensitizers Featuring a Planar Indeno[1,2-b]-Thiophene for Efficient Dye-Sensitized Solar Cells. *ChemSusChem* **2013**, *6*, 1425–1431.
- S2. Song, B. J.; Song, H. M.; Choi, I. K.; Kim, S. K.; Seo, K. D.; Kang, M. S.; Lee, M. J.; Cho, D. W.; Ju, M. J.; Kim, H. K. A Desirable Hole-Conducting Coadsorbent for Highly Efficient Dye-Sensitized Solar Cells through an Organic Redox Cascade Strategy. *Chem. Eur. J.* **2011**, *17*, 11115–11121.
- S3. Kang, M. S.; Kang, S. H.; Kim, S. K.; Choi, I. T.; Ryu, J. H.; Ju, M. J.; Cho, D.; Lee, J. Y.; Kim, H. K. Novel D- $\pi$ -A Structured Zn(II)-Porphyrin Dyes Containing a Bis(3,3-dimethylfluorenyl) Amine Moiety for Dye-Sensitized Solar Cells. *Chem. Commun.* **2012**,

48, 9349–9352.

- S4. Kang, S. H. *et al.* Novel D– $\pi$ –A structured porphyrin dyes with diphenylamine derived electron-donating substituents for highly efficient dye-sensitized solar cells. *J. Mater. Chem. A* **2013**, *1*, 3977–3982.
- S5. Choi, I. T. Ju, M. J.; Kang, S. H.; Kang, S. M.; You, B. S.; Hong, J. Y.; Eom, Y. K.; Song, S. H.; Kim, H. K. Structural Effect of Carbazole-Based Coadsorbents on the Photovoltaic Performance of Organic Dye-Sensitized Solar Cells. *J. Mater. Chem. A* **2013**, *1*, 9114–9121.
- S6. Zhong, M.; Kim, E. K.; McGann, J. P. Chun, S.-E.; Whitacre, J. F.; Jaroniec, M.; Matyjaszewski, K.; Kowalewski, T. Electrochemically Active Nitrogen-Enriched Nanocarbons with Well-Defined Morphology Synthesized by Pyrolysis of Self-Assembled Block Copolymer. *J. Am. Chem. Soc.* **2012**, *134*, 14846–14857.
- S7. Liberatore, M.; Petrocco, A.; Caprioli, F.; La Mesa, C.; Decker, F.; Bignozzi, C. A. Mass Transport and Charge Transfer Rates for Co(III)/Co(II) Redox Couple in a Thin-Layer Cell. *Electrochim. Acta* **2010**, *55*, 4025–4029.
